# Supplementary material
Source: MDPI journal article supplement (https://www.mdpi.com/2073-4441/15/19/3460)
Supplement: s1 [file s1 › water-2585117-supplementary.pdf]

**Table S1.** The top highly co-cited references in three largest clusters.

| CLUSTER | CITED REFERENCE                                                                                                                                               | CITATIONS | Total Link Strength |
|---------|---------------------------------------------------------------------------------------------------------------------------------------------------------------|-----------|---------------------|
| RED     | First confirmed detection of SARS-CoV-2 in untreated wastewater in Australia: A proof of concept for the wastewater surveillance of COVID-19 in the community | 486       | 12494               |
|         | Presence of SARS-Coronavirus-2 RNA in Sewage and Correlation with Reported COVID-19 Prevalence in the Early Stage of the Epidemic in The Netherlands          | 466       | 11890               |
|         | SARS-CoV-2 RNA in wastewater anticipated COVID-19 occurrence in a low prevalence area                                                                         | 362       | 10508               |
|         | First environmental surveillance for the presence of SARS-CoV-2 RNA in wastewater and river water in Japan                                                    | 240       | 7600                |
|         | SARS-CoV-2 in wastewater: State of the knowledge and research needs                                                                                           | 235       | 6754                |
| GREEN   | Measurement of SARS-CoV-2 RNA in wastewater tracks community infection dynamics                                                                               | 298       | 7736                |
|         | SARS-CoV-2 RNA in Wastewater Settled Solids Is Associated with COVID-19 Cases in a Large Urban Sewershed                                                      | 134       | 4040                |
|         | Correlation of SARS-CoV-2 RNA in wastewater with COVID-19 disease burden in sewersheds                                                                        | 123       | 3513                |
|         | COVID-19 containment on a college campus via wastewater-based epidemiology, targeted clinical testing and an intervention                                     | 104       | 2727                |
|         | Implementation of environmental surveillance for SARS-CoV-2 virus to support public health decisions: Opportunities and challenges                            | 102       | 2638                |
| BLUE    | Genome Sequencing of Sewage Detects Regionally Prevalent SARS-CoV-2 Variants                                                                                  | 101       | 2221                |
|         | Monitoring SARS-CoV-2 Circulation and Diversity through Community Wastewater Sequencing, the Netherlands and Belgium                                          | 72        | 1559                |
|         | Tracking SARS-CoV-2 in Sewage: Evidence of Changes in Virus Variant Predominance during COVID-19 Pandemic                                                     | 55        | 2008                |
|         | Detection of SARS-CoV-2 variants by genomic analysis of wastewater samples in Israel                                                                          | 41        | 1106                |
|         | Genetic Diversity and Evolutionary Convergence of Cryptic SARS-CoV-2 Lineages Detected Via Wastewater Sequencing                                              | 41        | 784                 |

**Table S2.** Citations per publication, SJR (scientific journal rankings), SNIP (source normalized impact per paper), cite score, quartiles, publisher, and publishing countries of top 10 influential Journals.

| <i>Journals</i>                                                          | <i>Citation per publication</i> | <i>Cite score</i> | <i>SJR (2022)</i> | <i>SNIP</i> | <i>Quartiles (2023)</i> | <i>Publisher</i>          | <i>Country</i> |
|--------------------------------------------------------------------------|---------------------------------|-------------------|-------------------|-------------|-------------------------|---------------------------|----------------|
| <b>Science of the Total Environment</b>                                  | 33.3                            | 16.80             | 1.946             | 2.026       | Q1                      | Elsevier                  | Netherlands    |
| <b>Water Research</b>                                                    | 48.01                           | 19.80             | 3.338             | 2.421       | Q1                      | Elsevier Ltd              | United Kingdom |
| <b>ACS ES&amp;T Water</b>                                                | 6.35                            | 3.20              | 0.957             | 0.786       | Q1                      | American Chemical Society | United States  |
| <b>Environmental Research</b>                                            | 25.3                            | 11.00             | 1.635             | 1.664       | Q1                      | Academic Press Inc.       | United States  |
| <b>Journal of Water and Health</b>                                       | 3.34                            | 3.50              | 0.52              | 0.80        | Q2                      | IWA Publishing Group      | United Kingdom |
| <b>Water</b>                                                             | 5.72                            | 5.5               | 0.72              | 1.06        | Q1                      | MDPI                      | Switzerland    |
| <b>Viruses-Basel</b>                                                     | 7.89                            | 7.1               | 1.29              | 1.07        | Q1                      | MDPI                      | Switzerland    |
| <b>International Journal of Environmental Research and Public Health</b> | 13.33                           | 5.40              | 0.828             | 1.280       | Q2                      | MDPI                      | Switzerland    |
| <b>Environmental Science and Pollution Research</b>                      | 4.86                            | 7.9               | 0.94              | 1.2         | Q1                      | Springer                  | Germany        |
| <b>PLOS ONE</b>                                                          | 5.33                            | 6.0               | 0.89              | 1.2         | Q1                      | Public Library of Science | United States  |
